1  
2  
3  
4  
5  
6  
7  
8  
9  
10  
11  
12  
13  
14  
15  
16  
17  
18  
19  
20  
21  
22  
23  
24  
25  
26  
27  
28

## A chromosome scale assembly of the model desiccation tolerant grass *Oropetium thomaeum*

Robert VanBuren<sup>1,2\*</sup>, Ching Man Wai<sup>1</sup>, Jens Keilwagen<sup>3</sup>, Jeremy Pardo<sup>4</sup>

<sup>1</sup>Department of Horticulture, Michigan State University, East Lansing, MI, 48824, USA

<sup>2</sup>Plant Resilience Institute, Michigan State University, East Lansing, MI, 48824, USA

<sup>3</sup>Institute for Biosafety in Plant Biotechnology, Julius Kühn-Institut (JKI) - Federal Research Centre for Cultivated Plants, Quedlinburg, Germany

<sup>4</sup>Department of Plant Biology, Michigan State University, East Lansing, MI, 48824, USA

\*corresponding author: [bobvanburen@gmail.com](mailto:bobvanburen@gmail.com)

### ***Abstract***

*Oropetium thomaeum* is an emerging model for desiccation tolerance and genome size evolution in grasses. A high-quality draft genome of *Oropetium* was recently sequenced, but the lack of a chromosome scale assembly has hindered comparative analyses and downstream functional genomics. Here, we reassembled *Oropetium*, and anchored the genome into ten chromosomes using Hi-C based chromatin interactions. A combination of high-resolution RNAseq data and homology-based gene prediction identified thousands of new, conserved gene models that were absent from the V1 assembly. This includes thousands of new genes with high expression across a desiccation timecourse. The sorghum and *Oropetium* genomes have a surprising degree of chromosome-level collinearity, and several chromosome pairs have near perfect synteny. Other chromosomes are collinear in the gene rich chromosome arms but have experienced pericentric translocations. Together, these resources will be useful for the grass comparative genomic community and further establish *Oropetium* as a model resurrection plant.

## 29 **Introduction**

30 Desiccation tolerance evolved as an adaptation to extreme and prolonged drying, and  
31 resurrection plants are among the most resilient plants on the planet. The molecular basis of  
32 desiccation tolerance is still largely unknown, but a number of models have emerged to dissect  
33 the genetic control of this trait (Hoekstra et al., 2001; Zhang and Bartels, 2018). The genomes of  
34 several model resurrection plants have been sequenced including *Boea hygrometrica* (Xiao et al.,  
35 2015), *Oropetium thomaeum* (VanBuren et al., 2015), *Xerophyta viscosa* (Costa et al., 2017),  
36 *Selaginella lepidophylla* (VanBuren et al., 2018), and *Selaginella tamariscina* (Xu et al., 2018).  
37 To date, no chromosome scale assemblies are available for these species, limiting large-scale  
38 quantitative genetics and comparative genomics based approaches. Many resurrection plants are  
39 polyploidy or have prohibitively large genomes including those in the genera *Boea*, *Xerophyta*,  
40 *Eragrostis*, *Sporobolus*, and *Craterostigma*. This complexity complicates genome assembly and  
41 gene redundancy in the polyploid species hinders downstream functional genomics work.

42 *Oropetium thomaeum* (hereon referred to as *Oropetium*), is a diploid resurrection plant  
43 and has the smallest genome among the grasses (245 Mb) (Bartels and Mattar, 2002). *Oropetium*  
44 plants are similar in size to *Arabidopsis*, but significantly smaller than the model grasses *Setaria*  
45 *italica* (Li and Brutnell, 2011) and *Brachypodium distachyon* (Brkljacic et al., 2011), with a short  
46 generation time of ~4 months. *Oropetium* is in the Chloridoideae subfamily of grasses and is  
47 closely related to the orphan cereal crops tef (*Eragrostis tef*) and finger millet (*Eleusine*  
48 *coracana*). Desiccation tolerance evolved independent several times within Chloridoideae (Gaff,  
49 1977; Gaff and Latz, 1978; Gaff, 1987) making it a useful system for studying convergent  
50 evolution. Together, these traits make *Oropetium* an attractive model for exploring the origin and  
51 molecular basis of desiccation tolerance. *Oropetium* was one of the first plants to be sequenced  
52 using the long reads of PacBio technology, and the assembly quality was comparable to early  
53 Sanger sequencing based plant genomes such as rice and *Arabidopsis* (VanBuren et al., 2015).  
54 Despite the high contiguity of *Oropetium* V1, the assembly has 625 contigs and the BioNano  
55 based genome map was unable to produce chromosome-scale scaffolds. Furthermore, the V1  
56 annotation was based on limited transcript evidence, and a high proportion of conserved plant  
57 genes were missing (VanBuren et al., 2015). Here, we reassembled the *Oropetium* genome using  
58 a more refined algorithm, and generated a chromosome scale assembly using Hi-C based  
59 chromatin interactions. The annotation quality was improved using high-resolution RNAseq data  
60 and protein homology, facilitating detailed comparative genomics with other grasses.

61

## 62 **Results**

63 The first version of the *Oropetium* genome (V1) was sequenced with high coverage PacBio data  
64 (~72x) followed by error correction and assembly using the hierarchical genome assembly  
65 process (HGAP) (VanBuren et al., 2015). We reassembled this PacBio data using the Canu  
66 assembler (Koren et al., 2017a), which can more accurately assemble and phase complex  
67 repetitive regions. The resulting Canu based assembly (hereon referred to as V1.2) had fewer  
68 contigs than the V1 HGAP assembly, but had otherwise similar assembly metrics (Table 1).

69 Draft contigs were polished using a two-step process to remove residual insertion/deletion (indel)  
70 and single nucleotide errors. Contigs were first polished using the raw PacBio data with  
71 Quiver(Chin et al., 2013), followed by four rounds of reiterative polishing with Pilon (Walker et  
72 al., 2014) using high coverage Illumina paired end data. The final V1.2 assembly contains 436  
73 contigs with an N50 of 2.0 Mb and total assembly size of 236 Mb. This is six megabases smaller  
74 than the V1 assembly, with slightly lower contiguity. More intact long terminal repeat  
75 retrotransposons (LTR-RTs) and centromere specific repeat arrays were identified in Oropetium  
76 V1.2 compared to V1, suggesting the Canu assembler resolved these repetitive elements more  
77 accurately. Thus, V1.2 was used for pseudomolecule construction.

78 The Oropetium V1.2 contigs were ordered and oriented into chromosome-scale  
79 pseudomolecules using high-throughput chromatin conformation capture (Hi-C). Hi-C leverages  
80 long-range interactions across distal regions of chromosomes to order and orient contigs. This  
81 approach is similar to genetic map-based anchoring, but with higher resolution. Illumina data  
82 generated from the Hi-C library was mapped to the V1.2 Oropetium genome using bwa (Li,  
83 2013) and the proximity-based clustering matrix was generated using the Juicer and 3d-DNA  
84 pipelines (Durand et al., 2016; Dudchenko et al., 2017). After filtering and manual curation, ten  
85 high confidence clusters were identified (Figure 1). These ten clusters correspond to the haploid  
86 chromosome number of Oropetium. Regions with low density interactions highlight the  
87 centromeric and pericentromeric regions, and regions with higher than expected interactions  
88 represent topologically associated domains. After splitting six chimeric PacBio contigs, 239  
89 contigs were anchored and oriented into ten chromosomes spanning 226.5 Mb or 95.8 % of the  
90 total assembled genome (Table 1). Chromosomes range in size from 11.0 to 34.7 Mb with an  
91 average size of 22.6 Mb. Most of the unanchored contigs are small (average size 42kb), or are  
92 entirely composed of rRNA, centromeric repeat arrays, or centromere specific LTR-RTs.  
93 Telomeres were identified at both ends of Chromosomes 1, 2, 3, 4, 5, 7, and 9 and on one end  
94 of Chromosomes 6, 8, and 10. Three unanchored contigs contain the remaining telomeres. This  
95 supports the completeness and accuracy of the pseudomolecule construction.

96 The chromosome scale Oropetium genome (hereon referred to as V2) was reannotated  
97 using the homology-based gene prediction program GeMoMa (Keilwagen et al., 2016;  
98 Keilwagen et al., 2018). Protein coding sequences from 11 angiosperm genomes and RNAseq  
99 data from Oropetium (VanBuren et al., 2017) were used as evidence. After filtering gene models  
100 derived from transposases, the final annotation consists of 28,835 high-confidence gene models.  
101 The annotation completeness was assessed using the Benchmarking Universal Single-Copy  
102 Ortholog (BUSCO) embryophyta dataset. The V2 gene models have a BUSCO score of 98.9%,  
103 suggesting the updated annotation is high-quality. In comparison, the Oropetium V1 annotation  
104 has a BUSCO score of 72%, and many conserved gene models were likely missing or mis-  
105 annotated. Nearly forty percent (11,227) of the gene models in V2 are new and were unannotated  
106 in V1. In addition, 10,837 gene models from V1 were removed or substantially improved in the  
107 V2 annotation. These discarded gene models either had little support based on protein homology  
108 to other species and transcript evidence from Oropetium, or they were misannotated transposable  
109 elements. In total, 94.3% of the gene models (27,216) were anchored to the ten chromosomes.  
110 Among the newly annotated gene models are 3,525 tandem gene duplicates (Figure 2a). Tandem

111 duplicates span 3,062 arrays with 7,760 total genes. Of the arrays containing three or more  
112 genes, only 49 are new to V2, and the majority contain genes previously identified in V1. The  
113 boundaries of tandem duplicates are difficult to correctly annotate, resulting in fusions of two or  
114 more gene copies. The homology based annotation used in V2 was able to parse previously fused  
115 gene models.

116 The expressions pattern of newly annotated genes was surveyed using previously  
117 generated RNAseq data (VanBuren et al., 2017). These timecourse datasets consist of seven  
118 samples from dehydrating and rehydrating *Oropetium* leaf tissue. Differentially expressed genes  
119 were identified based on comparisons of well-watered leaves with each dehydration and  
120 rehydration timepoint. In addition, each timepoint was compared with the timepoint immediately  
121 following it in the timecourse (ie. day 7 dehydration vs day 14). In the V1 annotation, 17,204  
122 genes had detectable expression (count > 0 in at least one sample) compared to 25,314 genes in  
123 V2 (Figure 2b). Of the expressed genes, 9,149 V1 and 11,948 V2 were classified as differentially  
124 expressed in at least one of the comparisons. Most newly annotated genes (8,110) have  
125 detectable expression in at least one of the seven timepoints, and the majority are expressed in all  
126 timepoints. In total, 2,799 new V2 gene models were differentially expressed, suggesting the  
127 new genes have important and previously uncharacterized roles in desiccation tolerance.

128 We used the chromosome scale assembly of *Oropetium* to survey patterns of genome  
129 organization and evolution related to maintaining a small genome size. The proportion of LTR-  
130 RTs in *Oropetium* V1 and V2 is similar, though V2 has more intact elements. LTR-RTs are the  
131 most abundant repetitive elements in *Oropetium* and collectively span 27% (62 Mb) of the  
132 genome. LTR-RTs are distributed non-randomly across the genome, and peaks of Gypsy LTR-  
133 RTs are observed in each of the ten chromosomes (Figure 3). These peaks of Gypsy LTR-RTs  
134 correspond to the pericentromeric regions. The pericentromeric regions show reduced  
135 intrachromosomal interactions in the Hi-C matrix, and contain arrays of centromeric repeats. The  
136 *Oropetium* V2 genome contains 8,965 155 bp monomeric centromeric repeats; considerably  
137 more than the 4,315 identified in the V1 assembly. The centromeric array sizes vary from 61 kb  
138 in chromosome 10 to 1,598 kb in Chromosome 4 (Figure 3; Table 2). Array sizes are likely  
139 underestimated, as only 52% of centromeric arrays were anchored to chromosomes, and 23  
140 unanchored contigs contain centromeric repeat arrays. Gene density is low in the  
141 pericentromeric regions, consistent with the rice, Sorghum, Maize, and *Brachypodium* genomes  
142 (Paterson et al., 2009; Initiative, 2010; Du et al., 2017; Jiao et al., 2017). Collectively,  
143 pericentromeric regions span 67.5 Mb or 29% of the genome, a much smaller proportion than  
144 sorghum (62%; 460 Mb) (Paterson et al., 2009), but higher than rice (15%; 63 Mb) (Goff et al.,  
145 2002). The majority of intact LTRs (86%; 628) have an insertion time of less than one million  
146 years ago, with a steep drop off of insertion time after 0.4 MYA. This suggests LTRs are rapidly  
147 fragmented and purged in *Oropetium* to maintain its small genome size.

148 Previous comparative genomics analyses supported a high degree of collinearity between  
149 *Oropetium* and other grass genomes, but the draft assembly prevented detailed chromosome  
150 level comparisons. To date, no chromosome scale assemblies are available for other  
151 Chloridoideae grasses, though a draft genome is available for the orphan grain crop tef

152 (*Eragrostis tef*) (Cannarozzi et al., 2014). We compared the V2 Oropetium chromosomes to the  
153 high-quality BTX 623 Sorghum genome (McCormick et al., 2018). Sorghum is in the  
154 Panicoideae subfamily of grasses which diverged from the ancestors of Chloridoideae ~31 MYA  
155 (Cotton et al., 2015). Despite this divergence, the ten chromosomes in Oropetium are largely  
156 collinear to the corresponding ten chromosomes in Sorghum, though large-scale inversions and  
157 translocations were identified (Figure 4a). Oropetium chromosomes 5, 6, and 8 are collinear  
158 along their length to sorghum chromosomes 9, 6, and 5 respectively. Oropetium chromosomes 1,  
159 2, 4, and 7, are collinear to the arms of sorghum chromosomes 4, 10, 1, and 2, but the pericentric  
160 regions have translocated to other chromosomes. Oropetium chromosome 9 and sorghum  
161 chromosome 7 are syntenic but have two large-scale inversions, and Oropetium and sorghum  
162 chromosome 3 are syntenic with one inversion.

163 The sorghum genome is roughly three fold larger than Oropetium, and genome size  
164 dynamics in grasses are driven by purge and accumulation of retrotransposons (Wicker et al.,  
165 2010). Gene rich regions of Oropetium are 2-3x more compact than orthologous regions in  
166 sorghum, and much of this expansion in sorghum is caused by intergenic blocks of LTR-RTs  
167 (Figure 4b), consistent with patterns observed in the V1 assembly (VanBuren et al., 2015). The  
168 chromosome-scale nature of Oropetium V2 allowed us to survey patterns of collinearity in the  
169 pericentromeric regions. These regions have a lower degree of synteny with sorghum compared  
170 to gene rich euchromatin, consistent with retrotransposon-mediated rearrangements (Figure 4b).  
171 Pericentromeres are greatly expanded in Oropetium compared to the gene rich euchromatic  
172 blocks, similar to patterns observed in sorghum. The low gene density and low collinearity  
173 hinder detailed comparisons between pericentromeric regions.

174

## 175 ***Discussion***

176 The Oropetium V1 assembly quality rivals the early Sanger based genomes, and is much higher  
177 than the wealth of plant genomes assembled from short read Illumina sequences. Despite the  
178 high contiguity, the assembly was not chromosome scale, and essential genes were unannotated  
179 because of limited transcript evidence. This reflects the need to improve even the highest quality  
180 plant genomes. Our updated V2 Oropetium assembly better captures the gene space and allows  
181 for chromosome scale comparisons. The updated annotation includes thousands of new genes  
182 with differential expression related to desiccation tolerance. Hi-C based chromatin interactions  
183 anchored highly repetitive contigs across the pericentromeres, which are challenging to anchor  
184 using a classic genetic or optical map based approach. Together, these resources provide a useful  
185 outgroup for comparative genomics across the panicoid grasses and serve as a valuable  
186 foundation for functional genomics in this emerging model grass species.

187

## 188 ***Methods***

### 189 *Genome reassembly*



190 The raw PacBio reads from the *Oropetium* V1 release (VanBuren et al., 2015) were reassembled  
191 with improved algorithms to better resolve highly complex and repetitive regions. PacBio data  
192 was error corrected and assembled using Canu (V1.4)(Koren et al., 2017b) with the following  
193 modifications: minReadLength=1500, GenomeSize=245Mb, minOverlapLength=1000. Other  
194 parameters were left as default. The resulting assembly graph was visualized in Bandage (Wick  
195 et al., 2015). The assembly graph was free of heterozygosity related bubbles, but many nodes  
196 (contigs) were interconnected by a high copy number retrotransposon. The Canu based contigs  
197 (assembly V1.2) were first polished using Quiver(Chin et al., 2013) with the raw PacBio data  
198 and default parameters. Contigs were further polished with Pilon (V1.22)(Walker et al., 2014)  
199 using ~120x coverage of paired-end 150 bp Illumina data. Quality-trimmed Illumina reads were  
200 aligned to the draft contigs using bowtie2 (V2.3.0) (Langmead and Salzberg, 2012) with default  
201 parameters. The overall alignment rate was 95.5%, which was slightly higher than alignment  
202 against the HGAP V1 assembly (94.5%). The following parameters for Pilon were modified: --  
203 flank 7, --K 49, and --mindepth 25. Other parameters were left as default. Pilon was run four  
204 times with an updated reference and realignment of Illumina data after each iteration. Indel  
205 corrections plateaued after the third iteration, suggesting polishing removed most residual  
206 assembly errors.

207

#### 208 *HiC library construction analysis, and genome anchoring*

209 *Oropetium* plants were maintained under day/night temperatures of 26 and 22°C respectively,  
210 with a light intensity of 200  $\mu\text{E m}^{-2} \text{sec}^{-1}$  and 16/8 hr photoperiod. Young leaf tissue was used  
211 for HiC library construction with the Proximo™ Hi-C Plant kit (Phase Genomics) following the  
212 manufactures protocol. Briefly, 0.2 grams of fresh, young leaf tissue was finely chopped and the  
213 chromatin was immediately crosslinked. The chromatin was fragmented and proximity ligated,  
214 followed by library construction. The final library was size selected for 300-600 bp and  
215 sequenced on the Illumina HiSeq 4000 under paired-end 150 bp mode. Adapters were trimmed  
216 and low-quality sequences were removed using Trimmomatic (V0.36) (Bolger et al., 2014). Read  
217 pairs were aligned to the *Oropetium* contigs using bwa (V0.7.16)(Li, 2013) with strict parameters  
218 (-n 0) to prevent mismatches and non-specific alignments in duplicated and repetitive regions.  
219 SAM files from bwa were used as input in the Juicer pipeline, and PCR duplicates with the same  
220 genome coordinates were filtered prior to constructing the interaction based distance matrix. In  
221 total, 101 filtered read pairs were used as input for the Juicer and 3d-DNA HiC analysis and  
222 scaffolding pipelines (Durand et al., 2016; Dudchenko et al., 2017). Contig ordering, orientation,  
223 and chimera splitting was done using the 3d-DNA pipeline(Dudchenko et al., 2017) under  
224 default parameters. Contig misassemblies and scaffold misjoins were manually detected and  
225 corrected based on interaction densities from visualization in Juicebox. In total, six chimeric  
226 contigs were identified and split at the junction with closest interaction data. The manually  
227 validated assembly was used as input to build the ten scaffolds (chromosomes) using the finalize-  
228 output.sh script from 3d-DNA. Chromosomes and unanchored contigs were renamed by size,  
229 producing the V2 assembly.

230

231 *Genome annotation*

232 The Oropetium V2 assembly was reannotated using the homology-based gene prediction program  
233 Gene Model Mapper (GeMoMa: V 1.5.2) (Keilwagen et al., 2016; Keilwagen et al., 2018).  
234 GeMoMa uses protein homology and RNAseq evidence to predict gene models. Genome  
235 assemblies and gene annotation for the following 11 species were downloaded from Phytozome  
236 (V12) and used as homology based evidence: *Arabidopsis thaliana*, *Brachypodium distachyon*,  
237 *Glycine max*, *Oryza sativa*, *Panicum hallii*, *Populus trichocarpa*, *Prunus persica*, *Setaria italica*,  
238 *Solanum lycopersicum*, *Sorghum bicolor*, *Theobroma cacao*. Translated coding exons and  
239 proteins from the reference gene annotations and genome assemblies were extracted using the  
240 module Extractor function of GeMoMa (module Extractor: Ambiguity=AMBIGUOUS, r=true).  
241 RNAseq data from Oropetium desiccation and rehydration timecourses (VanBuren et al., 2017)  
242 was aligned to the V2 Oropetium genome using HISAT2 (Kim et al., 2015) with default  
243 parameters. The resulting BAM files were used to extract intron and exon boundaries using the  
244 module ERE (module ERE: s=FR\_FIRST\_STRAND, c=true). translated coding exons from  
245 other species were aligned to the Oropetium genome using tblastn and transcripts were predicted  
246 based on each reference species independently using the extracted introns and coverage (module  
247 GeMoMa). Finally, the predictions based on the 11 reference species were combined to obtain a  
248 final prediction using the module GAF. Gene models containing transposases were filtered,  
249 resulting in a final annotation of 28,835 gene models. The annotation completeness was assessed  
250 using the plant specific Benchmarking Universal Single-Copy Ortholog (BUSCO) dataset  
251 (version 3.0.2, embryophyta\_odb9) (Simão et al., 2015). The following report was obtained from  
252 BUSCO: 98.9% overall, 95.4% single copy, 3.5% duplicated, 0.6% fragmented, 0.5% missing.  
253 Gene model names from V1 were conserved where possible, and new gene models received new  
254 names.

255

256 *Expression analysis*

257 Oropetium RNAseq data from desiccation and rehydration timecourses was reanalyzed using the  
258 updated gene model annotations (VanBuren et al., 2017). Four time points during dehydration  
259 (days 7, 14, 21, and 30), two during rehydration (24 and 48 hours), and one well-watered sample  
260 were analyzed. Based on principle component analysis, replicate 2 of the ‘well-watered and  
261 ‘D21’ samples were excluded from the analysis. Each other timepoint had three replicates. Gene  
262 expression was quantified on a transcript level using salmon (v 0.9.1) in quasi-mapping mode  
263 (Patro et al., 2017). Default parameters were used with the internal GC bias correction in salmon.  
264 The R package tximport (v 1.2.0) was used to map transcript level quantifications to gene level  
265 counts (Team, 2013; Sonesson et al., 2015). We conducted differential expression analysis with  
266 the remaining samples using the R package DESeq2 (v 1.14.1) set to default parameters [3,4].

267

268 *Identification of LTR-RTs*

269 A preliminary list of candidate long terminal repeat retrotransposons (LTR-RTs) from  
270 Oropetium were identified using LTR\_Finder (V1.02) (Xu and Wang, 2007) and LTRharvest  
271 (Ellinghaus et al., 2008). The following parameters for LTRharvest were modified: -similar 90 –  
272 vic 10 –seed 20 –minlenltr 100 –maxlenltr 7000 –mintsd 4 –maxtsd 6 –motif TGCA –motifmis  
273 1. LTR\_Finder parameters were: -D 15000 –d 1000 –L 7000 –l 100 –p 20 –C –M 0.9.  
274 LTR\_retriever(Ou and Jiang, 2017) was used to filter out false LTR retrotransposons using the  
275 target site duplications, terminal motifs, and Pfam domains. Default parameters were used for  
276 LTRretriever. LTRretriever produced a list of full length, high-quality LTRs. LTRs were  
277 annotated across the genome using RepeatMasker (<http://www.repeatmasker.org/>)(Smit et al.,  
278 1996) and the non-redundant LTR-RT library constructed by LTR\_retriever. The insertion time  
279 of intact LTRs was calculated in LTR\_retriever using the formula  $T=K/2\mu$  with a neutral  
280 mutation rate of  $\mu=1 \times 10^{-8}$  mutations per bp per year.

281

### 282 *Comparative genomics*

283 Syntenic gene pairs between the Oropetium and Sorghum genomes were identified using the  
284 MCSCAN toolkit (V1.1) (Wang et al., 2012) implemented in python  
285 ([https://github.com/tanghaibao/jcvi/wiki/MCscan-\(Python-version\)](https://github.com/tanghaibao/jcvi/wiki/MCscan-(Python-version))). Default parameters were  
286 used. Gene models were aligned using LAST and hits were filtered to find the best 1:1 syntenic  
287 blocks. Macrosyntenic dotplots were constructed in MCScan.

288

### 289 **Availability of supporting data:**

290 The V2 Oropetium genome assembly and updated annotation can be downloaded from CoGe  
291 (<https://genomeevolution.org/coge>) under Genome ID 51527 and from Phytozome  
292 (<https://phytozome.jgi.doe.gov/pz/portal.html>). The raw Hi-C Illumina data has been deposited  
293 on the Short Read Archive (SRA) under NCBI BioProject ID PRJNA481965.

294



295 **References:**

296

- 297 **Bartels, D., and Mattar, M.** (2002). *Oropetium thomaeum*: A resurrection grass with a diploid genome.  
298 *Maydica* **47**, 185-192.
- 299 **Bolger, A.M., Lohse, M., and Usadel, B.** (2014). Trimmomatic: a flexible trimmer for Illumina sequence  
300 data. *Bioinformatics*, btu170.
- 301 **Brkljacic, J., Grotewold, E., Scholl, R., Mockler, T., Garvin, D.F., Vain, P., Brutnell, T., Sibout, R., Bevan,  
302 M., and Budak, H.** (2011). *Brachypodium* as a model for the grasses: today and the future. *Plant  
303 Physiology*, pp. 111.179531.
- 304 **Cannarozzi, G., Plaza-Wüthrich, S., Esfeld, K., Larti, S., Wilson, Y.S., Girma, D., de Castro, E., Chanyalew,  
305 S., Blösch, R., and Farinelli, L.** (2014). Genome and transcriptome sequencing identifies breeding  
306 targets in the orphan crop tef (*Eragrostis tef*). *BMC genomics* **15**, 581.
- 307 **Chin, C.-S., Alexander, D.H., Marks, P., Klammer, A.A., Drake, J., Heiner, C., Clum, A., Copeland, A.,  
308 Huddleston, J., and Eichler, E.E.** (2013). Nonhybrid, finished microbial genome assemblies from  
309 long-read SMRT sequencing data. *Nature methods* **10**, 563-569.
- 310 **Costa, M., Artur, M., Maia, J., Jonkheer, E., Derks, M., Nijveen, H., Williams, B., Mundree, S.G.,  
311 Jiménez-Gómez, J.M., and Hesselink, T.** (2017). A footprint of desiccation tolerance in the  
312 genome of *Xerophyta viscosa*. *Nature plants* **3**, 17038.
- 313 **Cotton, J.L., Wysocki, W.P., Clark, L.G., Kelchner, S.A., Pires, J.C., Edger, P.P., Mayfield-Jones, D., and  
314 Duvall, M.R.** (2015). Resolving deep relationships of PACMAD grasses: a phylogenomic  
315 approach. *BMC plant biology* **15**, 178.
- 316 **Du, H., Yu, Y., Ma, Y., Gao, Q., Cao, Y., Chen, Z., Ma, B., Qi, M., Li, Y., and Zhao, X.** (2017). Sequencing  
317 and de novo assembly of a near complete indica rice genome. *Nature Communications* **8**, 15324.
- 318 **Dudchenko, O., Batra, S.S., Omer, A.D., Nyquist, S.K., Hoeger, M., Durand, N.C., Shamim, M.S.,  
319 Machol, I., Lander, E.S., and Aiden, A.P.** (2017). De novo assembly of the *Aedes aegypti* genome  
320 using Hi-C yields chromosome-length scaffolds. *Science* **356**, 92-95.
- 321 **Durand, N.C., Shamim, M.S., Machol, I., Rao, S.S., Huntley, M.H., Lander, E.S., and Aiden, E.L.** (2016).  
322 Juicer provides a one-click system for analyzing loop-resolution Hi-C experiments. *Cell systems* **3**,  
323 95-98.
- 324 **Ellinghaus, D., Kurtz, S., and Willhoeft, U.** (2008). LTRharvest, an efficient and flexible software for de  
325 novo detection of LTR retrotransposons. *BMC bioinformatics* **9**, 18.
- 326 **Gaff, D.** (1977). Desiccation tolerant vascular plants of Southern Africa. *Oecologia* **31**, 95-109.
- 327 **Gaff, D.** (1987). Desiccation tolerant plants in South America. *Oecologia* **74**, 133-136.
- 328 **Gaff, D., and Latz, P.** (1978). The occurrence of resurrection plants in the Australian flora. *Australian  
329 Journal of Botany* **26**, 485-492.
- 330 **Goff, S.A., Ricke, D., Lan, T.-H., Presting, G., Wang, R., Dunn, M., Glazebrook, J., Sessions, A., Oeller, P.,  
331 and Varma, H.** (2002). A draft sequence of the rice genome (*Oryza sativa* L. ssp. japonica).  
332 *Science* **296**, 92-100.
- 333 **Hoekstra, F.A., Golovina, E.A., and Buitink, J.** (2001). Mechanisms of plant desiccation tolerance. *Trends  
334 in plant science* **6**, 431-438.
- 335 **Initiative, I.B.** (2010). Genome sequencing and analysis of the model grass *Brachypodium distachyon*.  
336 *Nature* **463**, 763.
- 337 **Jiao, Y., Peluso, P., Shi, J., Liang, T., Stitzer, M.C., Wang, B., Campbell, M.S., Stein, J.C., Wei, X., and  
338 Chin, C.-S.** (2017). Improved maize reference genome with single-molecule technologies.  
339 *Nature*.

- 340 **Keilwagen, J., Hartung, F., Paulini, M., Twardziok, S.O., and Grau, J.** (2018). Combining RNA-seq data  
341 and homology-based gene prediction for plants, animals and fungi. *BMC bioinformatics* **19**, 189.
- 342 **Keilwagen, J., Wenk, M., Erickson, J.L., Schattat, M.H., Grau, J., and Hartung, F.** (2016). Using intron  
343 position conservation for homology-based gene prediction. *Nucleic acids research* **44**, e89-e89.
- 344 **Kim, D., Langmead, B., and Salzberg, S.L.** (2015). HISAT: a fast spliced aligner with low memory  
345 requirements. *Nature methods* **12**, 357.
- 346 **Koren, S., Walenz, B.P., Berlin, K., Miller, J.R., Bergman, N.H., and Phillippy, A.M.** (2017a). Canu:  
347 scalable and accurate long-read assembly via adaptive k-mer weighting and repeat separation.  
348 *bioRxiv*, 071282.
- 349 **Koren, S., Walenz, B.P., Berlin, K., Miller, J.R., Bergman, N.H., and Phillippy, A.M.** (2017b). Canu:  
350 scalable and accurate long-read assembly via adaptive k-mer weighting and repeat separation.  
351 *Genome research* **27**, 722-736.
- 352 **Langmead, B., and Salzberg, S.L.** (2012). Fast gapped-read alignment with Bowtie 2. *Nature methods* **9**,  
353 357-359.
- 354 **Li, H.** (2013). Aligning sequence reads, clone sequences and assembly contigs with BWA-MEM. *arXiv*  
355 preprint *arXiv:1303.3997*.
- 356 **Li, P., and Brutnell, T.P.** (2011). *Setaria viridis* and *Setaria italica*, model genetic systems for the Panicoid  
357 grasses. *Journal of experimental botany* **62**, 3031-3037.
- 358 **McCormick, R.F., Truong, S.K., Sreedasyam, A., Jenkins, J., Shu, S., Sims, D., Kennedy, M.,**  
359 **Amirebrahimi, M., Weers, B.D., and McKinley, B.** (2018). The Sorghum bicolor reference  
360 genome: improved assembly, gene annotations, a transcriptome atlas, and signatures of  
361 genome organization. *The Plant Journal* **93**, 338-354.
- 362 **Ou, S., and Jiang, N.** (2017). LTR\_retriever: A Highly Accurate And Sensitive Program For Identification Of  
363 LTR Retrotransposons. *bioRxiv*.
- 364 **Paterson, A.H., Bowers, J.E., Bruggmann, R., Dubchak, I., Grimwood, J., Gundlach, H., Haberer, G.,**  
365 **Hellsten, U., Mitros, T., and Poliakov, A.** (2009). The Sorghum bicolor genome and the  
366 diversification of grasses. *Nature* **457**, 551.
- 367 **Patro, R., Duggal, G., Love, M.I., Irizarry, R.A., and Kingsford, C.** (2017). Salmon provides fast and bias-  
368 aware quantification of transcript expression. *Nature methods* **14**, 417.
- 369 **Simão, F.A., Waterhouse, R.M., Ioannidis, P., Kriventseva, E.V., and Zdobnov, E.M.** (2015). BUSCO:  
370 assessing genome assembly and annotation completeness with single-copy orthologs.  
371 *Bioinformatics* **31**, 3210-3212.
- 372 **Smit, A.F., Hubley, R., and Green, P.** (1996). RepeatMasker Open-3.0.
- 373 **Soneson, C., Love, M.I., and Robinson, M.D.** (2015). Differential analyses for RNA-seq: transcript-level  
374 estimates improve gene-level inferences. *F1000Research* **4**.
- 375 **Team, R.C.** (2013). R: A language and environment for statistical computing.
- 376 **VanBuren, R., Wai, J., Zhang, Q., Song, X., Edger, P.P., Bryant, D., Michael, T.P., Mockler, T.C., and**  
377 **Bartels, D.** (2017). Seed desiccation mechanisms co-opted for vegetative desiccation in the  
378 resurrection grass *Oropetium thomeaum*. *Plant, Cell & Environment*.
- 379 **VanBuren, R., Wai, C.M., Ou, S., Pardo, J., Bryant, D., Jiang, N., Mockler, T.C., Edger, P., and Michael,**  
380 **T.P.** (2018). Extreme haplotype variation in the desiccation-tolerant clubmoss *Selaginella*  
381 *lepidophylla*. *Nature communications* **9**, 13.
- 382 **VanBuren, R., Bryant, D., Edger, P.P., Tang, H., Burgess, D., Challabathula, D., Spittle, K., Hall, R., Gu, J.,**  
383 **and Lyons, E.** (2015). Single-molecule sequencing of the desiccation-tolerant grass *Oropetium*  
384 *thomeaum*. *Nature*.
- 385 **Walker, B.J., Abeel, T., Shea, T., Priest, M., Abouelliel, A., Sakthikumar, S., Cuomo, C.A., Zeng, Q.,**  
386 **Wortman, J., and Young, S.K.** (2014). Pilon: an integrated tool for comprehensive microbial  
387 variant detection and genome assembly improvement. *PLoS one* **9**, e112963.

- 388 **Wang, Y., Tang, H., DeBarry, J.D., Tan, X., Li, J., Wang, X., Lee, T.-h., Jin, H., Marler, B., and Guo, H.**  
389 (2012). MCScanX: a toolkit for detection and evolutionary analysis of gene synteny and  
390 collinearity. *Nucleic acids research* **40**, e49-e49.
- 391 **Wick, R.R., Schultz, M.B., Zobel, J., and Holt, K.E.** (2015). Bandage: interactive visualization of de novo  
392 genome assemblies. *Bioinformatics* **31**, 3350-3352.
- 393 **Wicker, T., Buchmann, J.P., and Keller, B.** (2010). Patching gaps in plant genomes results in gene  
394 movement and erosion of colinearity. *Genome research*, gr. 107284.107110.
- 395 **Xiao, L., Yang, G., Zhang, L., Yang, X., Zhao, S., Ji, Z., Zhou, Q., Hu, M., Wang, Y., and Chen, M.** (2015).  
396 The resurrection genome of *Boea hygrometrica*: A blueprint for survival of dehydration.  
397 *Proceedings of the National Academy of Sciences* **112**, 5833-5837.
- 398 **Xu, Z., and Wang, H.** (2007). LTR\_FINDER: an efficient tool for the prediction of full-length LTR  
399 retrotransposons. *Nucleic Acids Research* **35**, W265-W268.
- 400 **Xu, Z., Xin, T., Bartels, D., Li, Y., Gu, W., Yao, H., Liu, S., Yu, H., Pu, X., and Zhou, J.** (2018). Genome  
401 analysis of the ancient tracheophyte *Selaginella tamariscina* reveals evolutionary features  
402 relevant to the acquisition of desiccation tolerance. *Molecular plant*.
- 403 **Zhang, Q., and Bartels, D.** (2018). Molecular responses to dehydration and desiccation in desiccation-  
404 tolerant angiosperm plants. *Journal of experimental botany* **69**, 3211-3222.

405

406

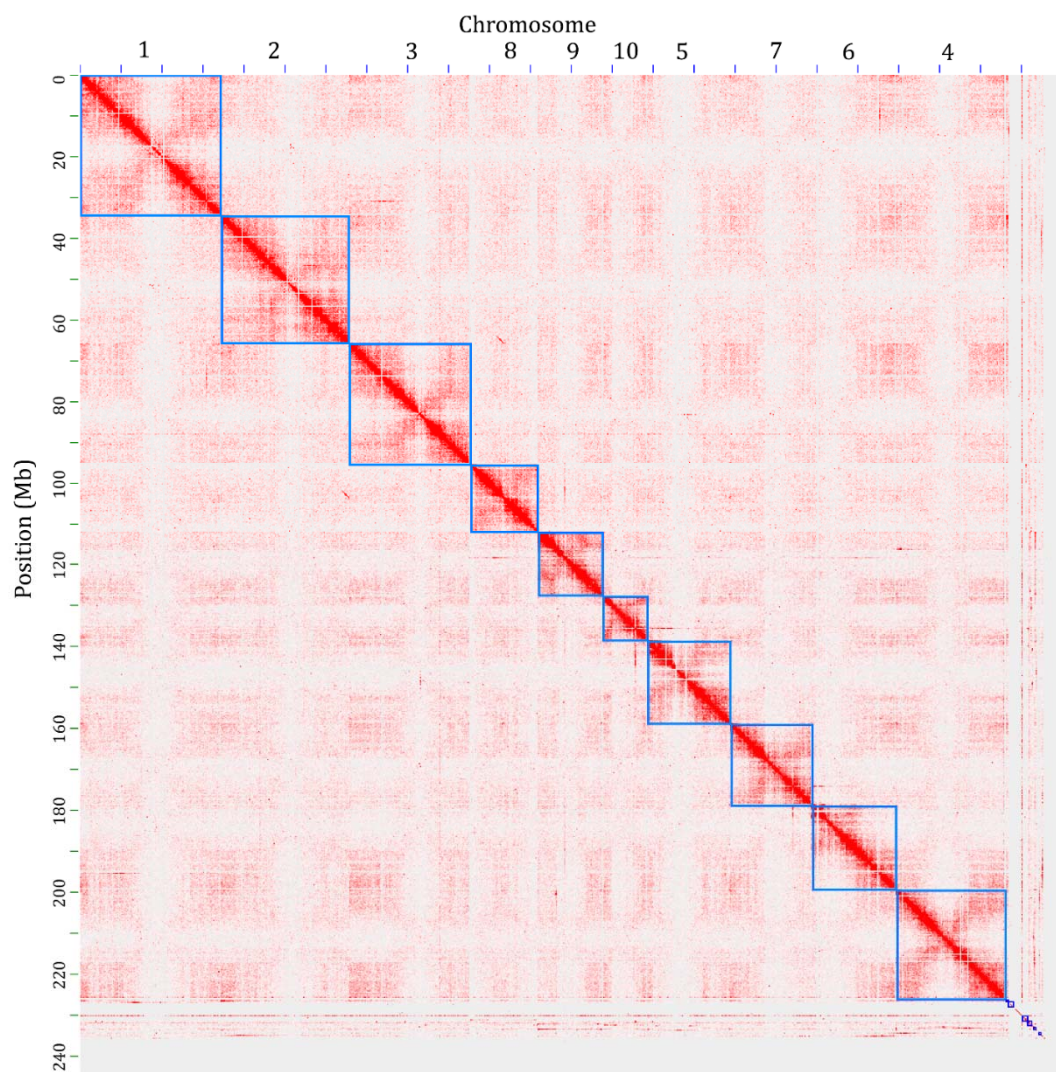

407

408 **Figure 1. Hi-C based contig anchoring.** Post-clustering heat map showing density of Hi-C interactions  
409 between contigs from the Juicer and 3d-DNA pipeline. The ten Oropetium chromosomes are highlighted  
410 by blue squares.

411

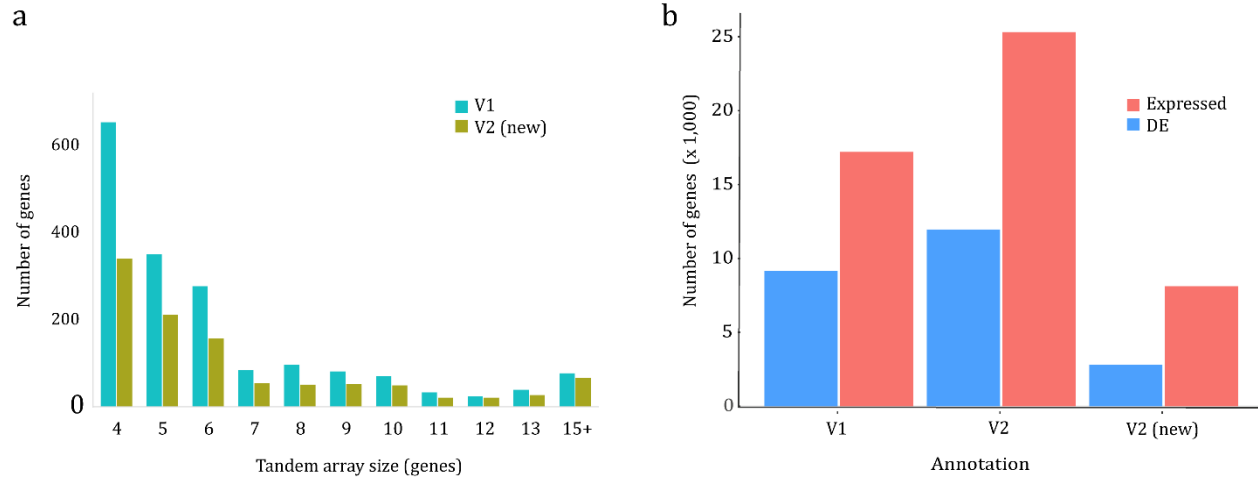

412

413

414 **Figure 2. Characterization of the updated V2 Oropetium annotation.** (a) Tandem gene array size  
415 comparison of the V1 and V2 annotation. Tandem genes identified in V1 are shown in blue and tandem  
416 genes newly annotated in V2 are shown in gold. (b) Comparison of expression patterns from the V1 and  
417 V2 annotation. The total number of genes with detectable expression and differential expression (DE) in  
418 the Oropetium desiccation/rehydration timecourse are plotted.



419

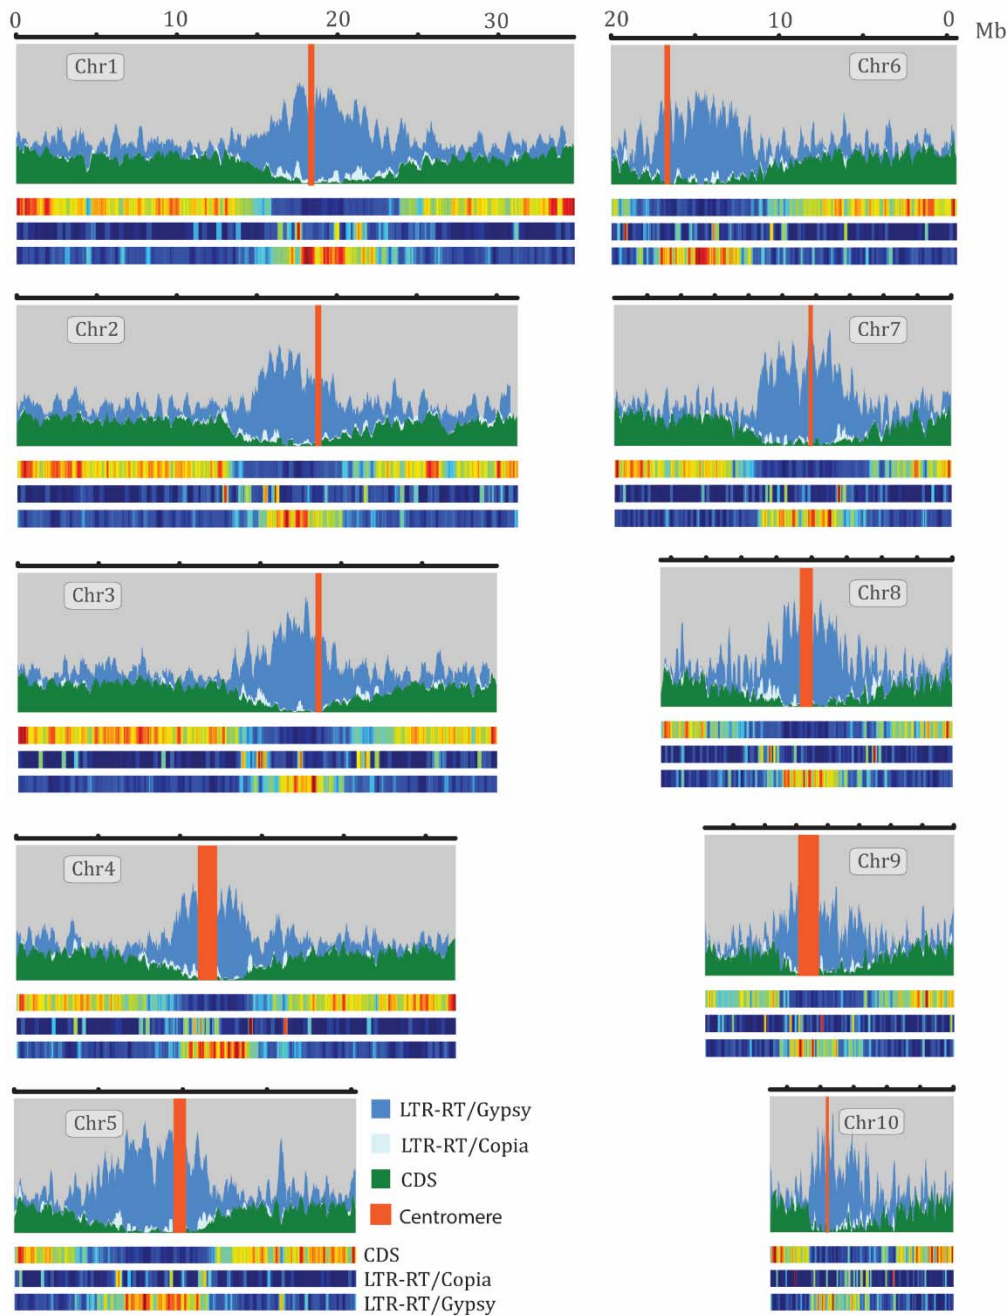

420

421 **Figure 3. Landscape of the Oropetium genome.** *Gypsy* and *Copia* long terminal repeat retrotransposons  
422 (LTR-RT) and CDS density are plotted for the ten Oropetium chromosomes. Features are plotted in  
423 sliding windows of 50kb with 25kb step size. The location of centromere specific tandem arrays is  
424 highlighted by red bars. The heatmaps below each landscape show relative density with red indicating  
425 high density and blue indicating low density for each feature.

426

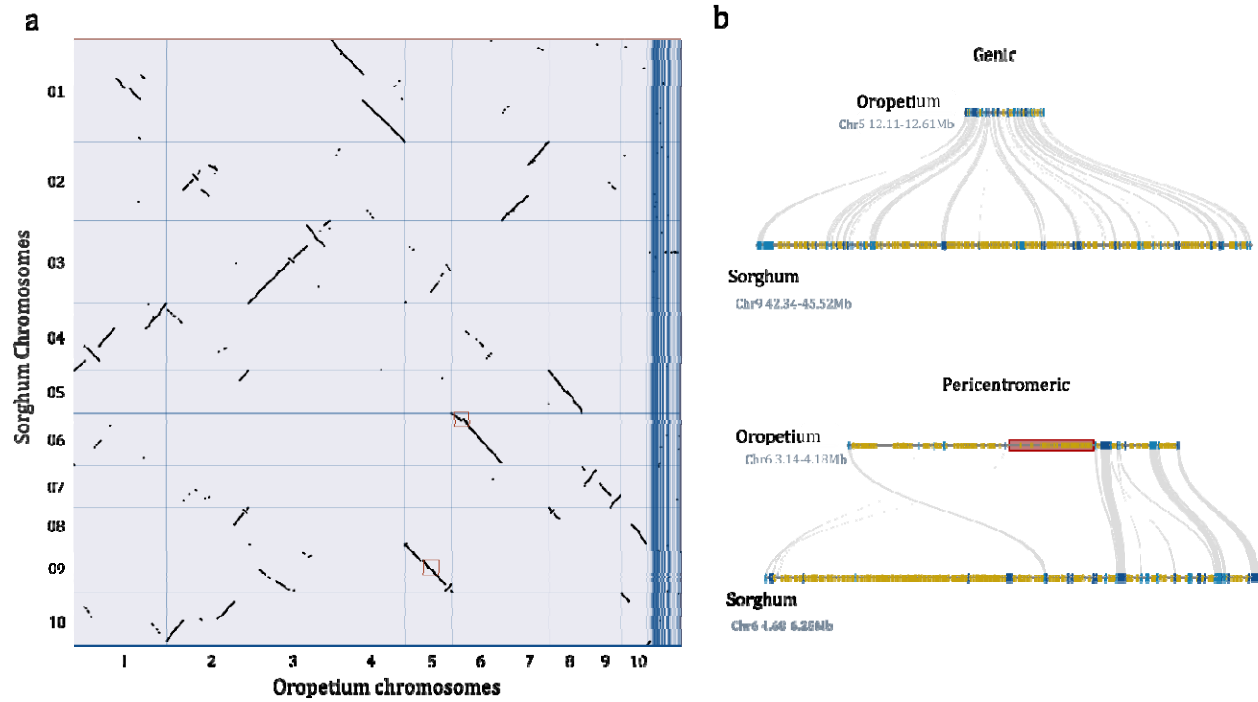

427

428 **Figure 4. Comparative genomics between Oropetium and Sorghum.** (a) Macrosyntentic dotplot of the  
429 Oropetium and Sorghum chromosomes based on 18,889 gene pairs. Each black dot represents a syntenic  
430 region between the two genomes. (b) Microsynteny of a typical genic region of Sorghum and Oropetium  
431 (top) and the pericentromeric region of Chromosome 6 of Oropetium and Sorghum (bottom). LTR-RTs  
432 are shown in yellow and genes are shown in blue. Syntenic orthologs are connected by gray lines. The  
433 centromeric repeat array in Oropetium is shown in red.

434

435 **Table 1:** Comparison of the Oropetium V1 and V2 assembly and annotation statistics

| Statistics          | V1      | V2      |
|---------------------|---------|---------|
| # of contigs        | 625     | 436     |
| Contig N50          | 2.38 Mb | 2.02 Mb |
| Scaffold N50        | NA      | 20.5 Mb |
| Total assembly size | 243 Mb  | 236 Mb  |
| Gene models         | 28,446  | 28,835  |
| BUSCO               | 72.1%   | 98.9%   |

436

437

438 **Table 2:** Centromeric repeat array composition

| <b>Chromosome</b> | <b>Start Cent. Array (bp)</b> | <b>End Cent. Array (bp)</b> | <b>Number of Cent. Repeats</b> | <b>Cent. Size (bp)</b> |
|-------------------|-------------------------------|-----------------------------|--------------------------------|------------------------|
| Chr_1             | 18,899,082                    | 19,114,162                  | 154                            | 215,080                |
| Chr_2             | 18,277,215                    | 18,463,229                  | 786                            | 186,014                |
| Chr_3             | 18,882,303                    | 18,993,598                  | 308                            | 111,295                |
| Chr_4             | 11,739,636                    | 13,338,554                  | 176                            | 1,598,918              |
| Chr_5             | 10,361,368                    | 10,828,355                  | 800                            | 466,987                |
| Chr_6             | 3,649,010                     | 3,746,417                   | 513                            | 97,407                 |
| Chr_7             | 12,434,273                    | 12,559,564                  | 272                            | 125,291                |
| Chr_8             | 8,288,262                     | 9,010,114                   | 306                            | 721,852                |
| Chr_9             | 6,142,739                     | 7,433,209                   | 1,044                          | 1,290,470              |
| Chr_10            | 3,147,692                     | 3,209,432                   | 155                            | 61,740                 |
| Unanchored        |                               |                             | 4,258                          | 982,774                |

439

440
